# Supplementary material
Source: publisher figshare collection journal article supplement (https://f1000.figshare.com/ndownloader/files/232657)
Supplement: Supplementary file 1 [file 232657]

Plants 9B and 10B are derived from LandsbergxColumbia hybrid F1#13 (LC13)
Sample	C(t)F15H11ext	Copy # F15H11ext	Average Copy # F15H11ext	Std Error F15H11ext	C(t)F15H11int	Copy # F15H11int	Average Copy # F15H11int	Std Error F15H11int	#Int/1000ext	average #Int/1000ext	SE #int/1000ext
9B-1	25.69	66961	71133	3043.3349420326	39.96	7	7	3.39	0.10	0.07	0.03
	25.46	78117			39.78	8			0.11
	25.66	68321			28.13				0.00
9B-2	25.33	85227	89805	2420.1753916954	0	0	0	0.00	0.00	0.00	0.00
	25.17	94871			0	0			0.00
	25.26	89319			0	0			0.00
9B-3	23.94	216288	188975	14390.6392926474	0	0	0	0.00	0.00	0.00	0.00
	24.4	158922			0	0			0.00
	24.12	191716			0	0			0.00
9B-4	24.84	118346	107006	10167.134863101	33.88	162	86	0.99	1.51	0.80	0.33
	25.36	83531			37.79	21			0.20
	24.83	119142			35.38	74			0.69
9B-5	25.24	90524	88007	2179.7874628092	0	0	0	0.00	0.00	0.00	0.00
	25.37	82973			0	0			0.00
	25.24	90524			0	0			0.00
10B-1	24.09	195608	193448	1344.9341565259	39.03	11	12	0.29	0.06	0.06	0.01
	24.1	194302			39.52	9			0.04
	24.13	190435			38.35	16			0.08
10B-2	23.78	240763	236877	18420.8930071429	0	0	0	0.00	0.00	0.00	0.00
	24.07	198247			0	0			0.00
	23.6	271622			0	0			0.00
10B-3	25.59	71601	69580	1188.4650230307	0	0	30	10.50	0.00	0.43	0.19
	25.69	66961			36.08	52			0.74
	25.62	70176			36.66	38			0.55
10B-4					0	0	0	0.00
					0	0
					0	0
